# Supplementary material for: Antibodies against ARHGDIB are associated with long‐term kidney graft loss
Source: PubMed Central journal article supplement — Am J Transplant. 2019 Jul 3;19(12):3335–44. doi: 10.1111/ajt.15493 (PMC6899679; doi:10.1111/ajt.15493), 2019-07-03
Supplement: AJT-19-3335-s001.pdf [file AJT-19-3335-s001.pdf]

## Supporting Information

### Antibodies against ARHGDIB are associated with long-term kidney graft loss

#### Table of Contents

|                                                                                                                                                                                |   |
|--------------------------------------------------------------------------------------------------------------------------------------------------------------------------------|---|
| <b>Supplemental Figure S1.</b> Showing the individual MFI values for all measured non-HLA antibodies in 4770 kidney transplant recipients. ....                                | 2 |
| <b>Supplemental Figure S2.</b> Showing the individual signal-to-background ratios for all measured non-HLA antibodies in 4770 kidney transplant recipients. ....               | 3 |
| <b>Supplemental Figure S3.</b> 10-year rejection free survival for patients with ARHGDIB antibodies transplanted with a deceased donor kidney (N=3276). ....                   | 4 |
| <b>Supplemental Table S1.</b> Overview of the selected cut-offs based on the maximal graft survival difference in 4770 kidney transplant patients. ....                        | 5 |
| <b>Supplemental Table S2.</b> Multivariable analyses of 10-year death-censored graft failure for the presence of different non-HLA antibodies in the total cohort (N=4770). .. | 6 |
| <b>Supplemental Table S3.</b> Multivariable analyses of 1-year death-censored graft failure for the presence of antibodies against ARHGDIB. ....                               | 7 |

## Pretransplant sera of kidney transplant recipients (n=4770)

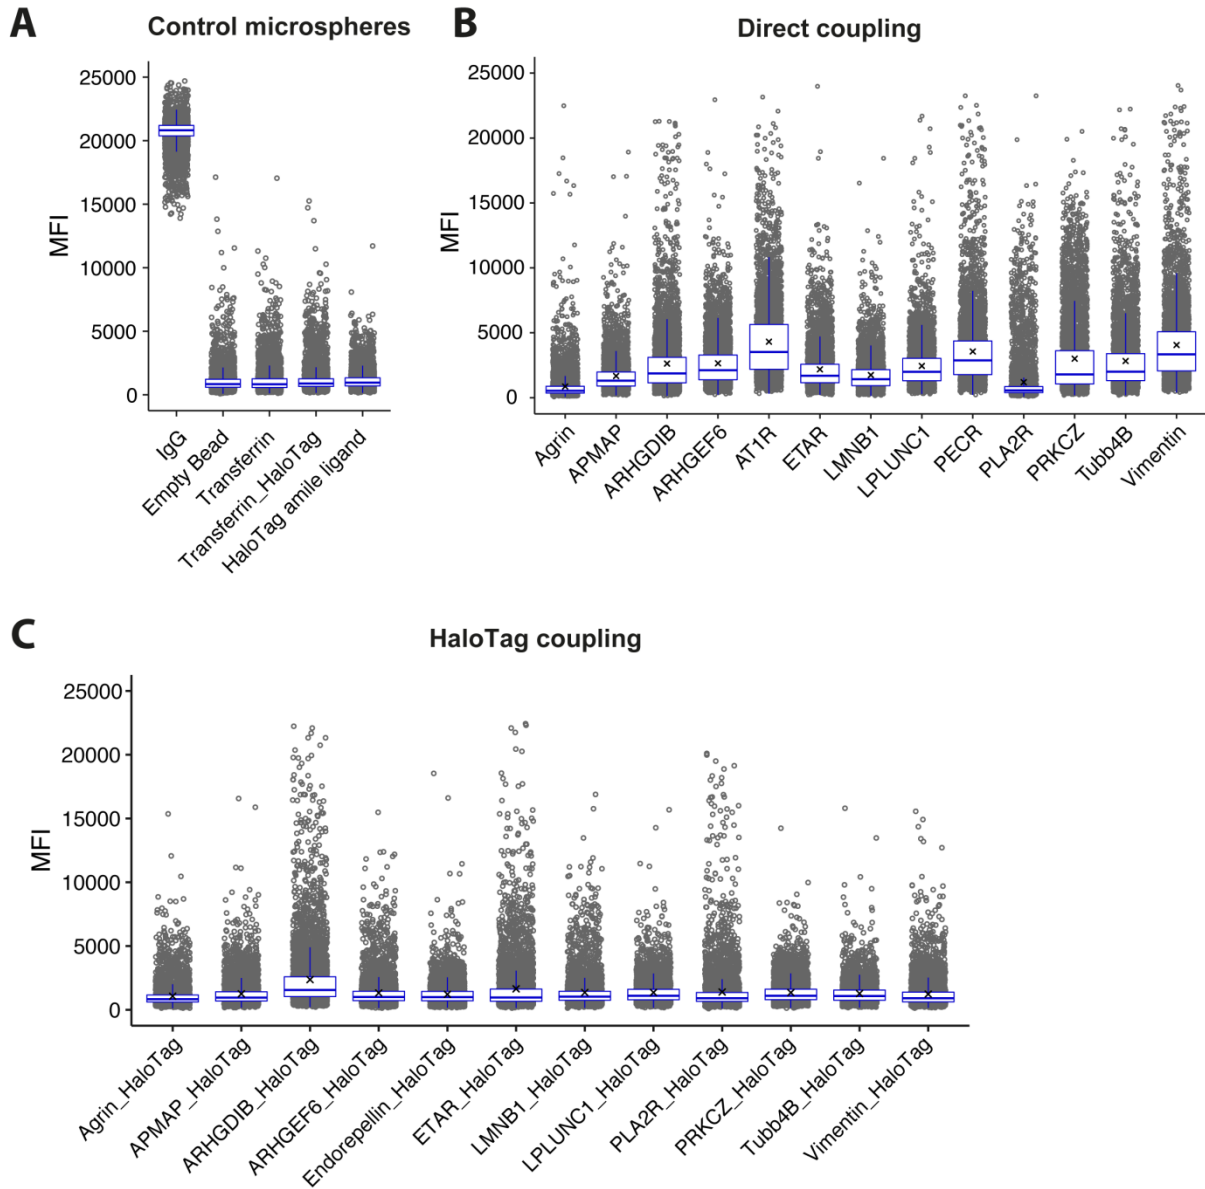

### Supplemental Figure S1. Detection of non-HLA antibodies in 4770 kidney transplant recipients.

Shown are the individual MFI values with box and whisker plots (median and interquartile range in blue, and the black X represents the mean) for the positive control microsphere (IgG) and the 4 negative control microspheres (A), the 13 directly-coupled non-HLA proteins (B), and the 12 HaloTag-coupled non-HLA proteins (C). Directly-coupled Endorepellin was excluded from further analysis due to cross reactivity as mentioned in the manuscript describing the development and validation of this assay. The box plots (Tukey) were drawn in R 3.4.1. using ggplot package (geom\_boxplot). The lower and upper hinges correspond to the first and third quartiles (the 25th and 75th percentiles). The upper whisker extends from the hinge to the largest value no further than  $1.5 \times \text{IQR}$  from the hinge (where IQR is the inter-quartile range, or distance between the first and third quartiles). The lower whisker extends from the hinge to the smallest value at most  $1.5 \times \text{IQR}$  of the hinge. Data beyond the end of the whiskers are called "outlying" points and are plotted individually.

### A *Directly coupled non-HLA proteins*

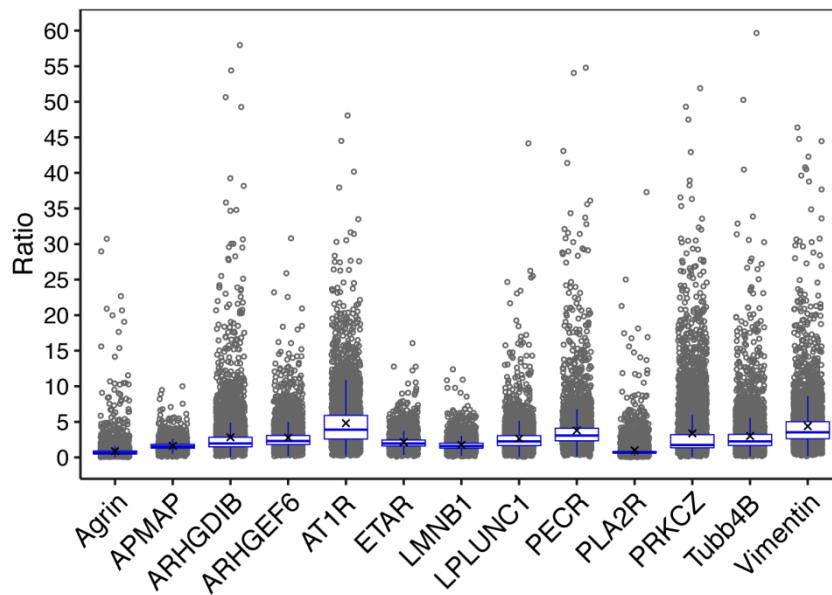

### B *HaloTag coupled non-HLA proteins*

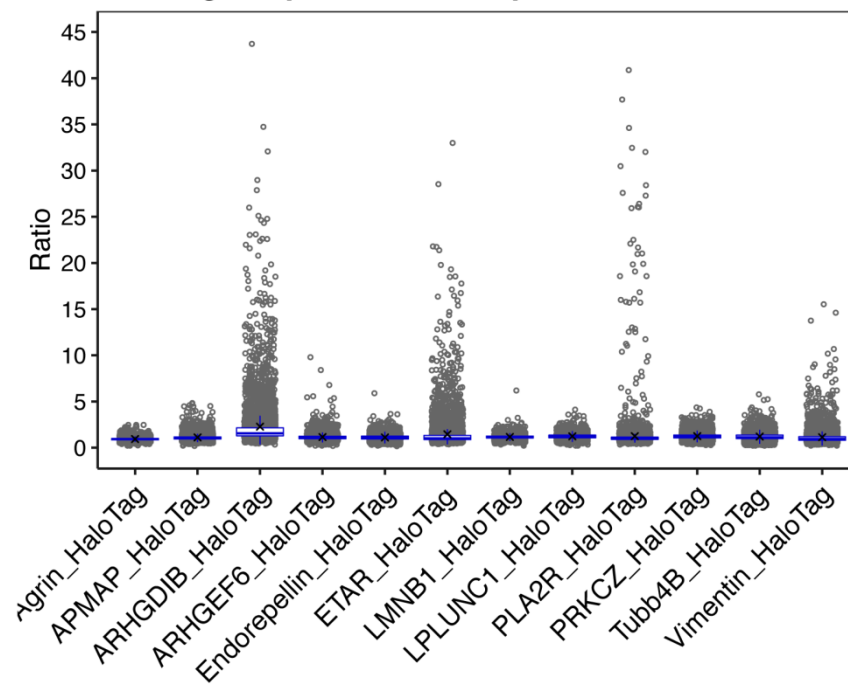

### Supplemental Figure S2. Detection of non-HLA antibodies in 4770 kidney transplant recipients.

Shown are the individual signal-to-background ratios with box and whisker plots (median and interquartile range in blue, and the black X represents the mean) for the 13 directly-coupled non-HLA proteins (**A**), and the 12 HaloTag coupled non-HLA proteins (**B**). Transferrin or Transferrin\_HaloTag microspheres were used as background accordingly. The box plots (Tukey) were drawn in R 3.4.1. using ggplot package (geom\_boxplot). The lower and upper hinges correspond to the first and third quartiles (the 25th and 75th percentiles). The upper whisker extends from the hinge to the largest value no further than  $1.5 \times \text{IQR}$  from the hinge (where IQR is the inter-quartile range, or distance between the first and third quartiles). The lower whisker extends from the hinge to the smallest value at most  $1.5 \times \text{IQR}$  of the hinge. Data beyond the end of the whiskers are called "outlying" points and are plotted individually.

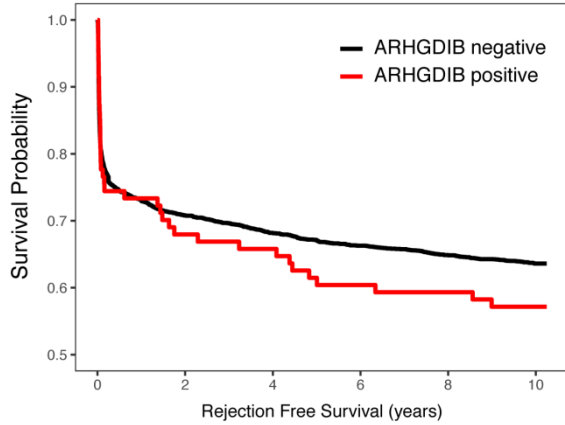

|             |      |      |      |      |      |      |
|-------------|------|------|------|------|------|------|
| ARHGDIB neg | 3182 | 2242 | 2159 | 2099 | 2055 | 2014 |
| ARHGDIB pos | 94   | 63   | 61   | 56   | 55   | 53   |

**Supplemental Figure S3. 10-year rejection free survival for patients with ARHGDIB antibodies transplanted with a deceased donor kidney (N=3276).** Rejection free survival was defined as whether a patient had a registered rejection (treatment) or not. This uncorrected analysis showed that the rejection free survival was comparable (not significantly different) between the positive and negative groups.

**Supplemental Table S1. Overview of the selected cut-offs based on the maximal graft survival difference in 4770 kidney transplant patients.**

| Coupling | Protein              | Ratio cut-off | Absolute MFI cut-off | Number of positive patients | % Positive patients | Graft survival difference between the non-HLA positive and negative group at: |         |          | Numbers at risk for the non-HLA positive group at: |         |          |
|----------|----------------------|---------------|----------------------|-----------------------------|---------------------|-------------------------------------------------------------------------------|---------|----------|----------------------------------------------------|---------|----------|
|          |                      |               |                      |                             |                     | 1 year                                                                        | 5 years | 10 years | 1 year                                             | 5 years | 10 years |
| Direct   | Agrin                | 3             | 1000                 | 97                          | 2.0 %               | 5.0 %                                                                         | 5.9 %   | 6.4 %    | 82                                                 | 69      | 45       |
|          | ETAR                 | 5             | 1500                 | 83                          | 1.7 %               | 3.5 %                                                                         | 8.3 %   | 7.3 %    | 72                                                 | 58      | 42       |
|          | PLA2R                | 7             | 500                  | 29                          | 0.6 %               | -1.7 %                                                                        | -1.5 %  | 9.5 %    | 27                                                 | 24      | 18       |
|          | LPLUNC1              | 9             | 500                  | 62                          | 1.2 %               | -0.5 %                                                                        | 10.8 %  | 6.7 %    | 54                                                 | 40      | 28       |
|          | ARHGDIB              | 10            | 500                  | 134                         | 2.8 %               | 5.9 %                                                                         | 10.9 %  | 13.1 %   | 113                                                | 92      | 66       |
|          | ARHGEF6              | 10            | 500                  | 53                          | 1.1 %               | 0.9 %                                                                         | 2.0 %   | 4.5 %    | 48                                                 | 41      | 29       |
|          | PECR                 | 12            | 500                  | 114                         | 2.4 %               | 3.8 %                                                                         | 10.7 %  | 7.6 %    | 100                                                | 78      | 56       |
|          | AT1R                 | 15            | 500                  | 106                         | 2.2 %               | 2.0 %                                                                         | 4.5 %   | 7.3 %    | 91                                                 | 75      | 48       |
|          | APMAP                | NA            | NA                   |                             |                     |                                                                               |         |          |                                                    |         |          |
|          | LMNB1                | NA            | NA                   |                             |                     |                                                                               |         |          |                                                    |         |          |
|          | PRKCZ                | NA            | NA                   |                             |                     |                                                                               |         |          |                                                    |         |          |
|          | TUBB4B               | NA            | NA                   |                             |                     |                                                                               |         |          |                                                    |         |          |
|          | Vimentin             | NA            | NA                   |                             |                     |                                                                               |         |          |                                                    |         |          |
| HaloTag  | ARHGEF6_HaloTag      | 2             | 2000                 | 55                          | 1.2 %               | 4.2%                                                                          | 7.1 %   | 0.7 %    | 49                                                 | 38      | 28       |
|          | LPLUNC1_HaloTag      | 2             | 2000                 | 41                          | 0.9 %               | -0.3 %                                                                        | 3.6 %   | 6.6 %    | 38                                                 | 31      | 20       |
|          | APMAP_HaloTag        | 2.5           | 500                  | 54                          | 1.1 %               | 0.7%                                                                          | 0.0 %   | 0.0 %    | 47                                                 | 36      | 23       |
|          | TUBB4B_HaloTag       | 2.5           | 500                  | 65                          | 1.4 %               | 3.8%                                                                          | -1.5 %  | -1.7 %   | 56                                                 | 49      | 32       |
|          | PRKCZ_HaloTag        | 2.5           | 1500                 | 45                          | 0.9 %               | 4.8 %                                                                         | 8.0 %   | 9.4 %    | 38                                                 | 31      | 17       |
|          | PLA2R_HaloTag        | 7             | 500                  | 42                          | 0.9 %               | -1.4 %                                                                        | 1.4 %   | 12.5 %   | 39                                                 | 34      | 23       |
|          | ETAR_HaloTag         | 8             | 500                  | 62                          | 1.3 %               | 1.1 %                                                                         | -0.8 %  | 4.7 %    | 56                                                 | 49      | 33       |
|          | Agrin_HaloTag        | NA            | NA                   |                             |                     |                                                                               |         |          |                                                    |         |          |
|          | ARHGDIB_HaloTag      | NA            | NA                   |                             |                     |                                                                               |         |          |                                                    |         |          |
|          | Endorepellin_HaloTag | NA            | NA                   |                             |                     |                                                                               |         |          |                                                    |         |          |
|          | LMNB1_HaloTag        | NA            | NA                   |                             |                     |                                                                               |         |          |                                                    |         |          |
|          | Vimentin_HaloTag     | NA            | NA                   |                             |                     |                                                                               |         |          |                                                    |         |          |

NA: not available, since there was no effect on the graft survival independent for all possible cut-offs.

**Supplemental Table S2. Multivariable analyses of 10-year death-censored graft failure for the presence of different non-HLA antibodies in the total cohort (N=4770).**

|                 | No. (%) of Transplants with non-HLA antibody | HR    | 95% CI      | p-value |
|-----------------|----------------------------------------------|-------|-------------|---------|
| Agrin           | 97 (2.0 %)                                   | 1.273 | 0.867-1.868 | 0.218   |
| ETAR            | 83 (1.7 %)                                   | 1.513 | 1.009-2.270 | 0.045   |
| PECR            | 114 (2.4%)                                   | 1.401 | 0.995-1.973 | 0.053   |
| PLA2R           | 29 (0.6 %)                                   | 1.580 | 0.817-3.057 | 0.174   |
| LPLUNC1         | 62 (1.2 %)                                   | 1.397 | 0.864-2.259 | 0.172   |
| ARHGEF6         | 53 (1.1 %)                                   | 1.210 | 0.713-2.054 | 0.480   |
| AT1R            | 106 (2.2 %)                                  | 1.297 | 0.896-1.878 | 0.169   |
| ARHGEF6_HaloTag | 55 (1.2 %)                                   | 1.113 | 0.644-1.925 | 0.701   |
| LPLUNC1_HaloTag | 41 (0.9 %)                                   | 1.430 | 0.827-2.475 | 0.201   |
| APMAP_HaloTag   | 54 (1.1 %)                                   | 1.259 | 0.743-2.134 | 0.393   |
| TUBB4B_HaloTag  | 65 (1.4 %)                                   | 1.013 | 0.573-1.792 | 0.964   |
| PRKCZ_HaloTag   | 45 (0.9 %)                                   | 1.488 | 0.860-2.573 | 0.155   |
| PLA2R_HaloTag   | 42 (0.9 %)                                   | 0.977 | 0.313-3.053 | 0.968   |
| ETAR_HaloTag    | 62 (1.3 %)                                   | 1.242 | 0.758-2.037 | 0.389   |

In this multivariable analysis we evaluated the effect of the presence of pretransplant single non-HLA antibodies on the 10-year death-censored graft failure and adjusted for differences in the following covariates: recipient age (quadratic), donor age (quadratic), donor type (living or deceased), cold ischemia time in hours for donation after brain death (DBD) and donation after cardiac death (DCD), time on dialysis in years (quadratic), induction therapy with interleukin- 2 receptor–blocking antibody and the presence of pretransplant donor-specific HLA antibodies against HLA-A/B/DR/DQ. CI, confidence interval; HR, hazard ratio. P<0.002 was considered statistically significant.

**Supplemental Table S3. Multivariable analyses of 1-year death-censored graft failure for the presence of antibodies against ARHGDIB.**

|                          | No. (%) of Transplants with non-HLA antibody | HR    | 95% CI      | p-value |
|--------------------------|----------------------------------------------|-------|-------------|---------|
| <b>ARHGDIB</b>           |                                              |       |             |         |
| Total cohort (N=4770)    | 134 (2.8%)                                   | 1.597 | 1.006-2.536 | 0.047   |
| Deceased donors (N=3276) | 94 (2.9%)                                    | 1.620 | 0.993-2.643 | 0.053   |
| Living donors (N=1494)   | 40 (2.7%)                                    | 1.387 | 0.336-5.726 | 0.651   |

In this multivariable analysis we evaluated the effect of the presence of pretransplant ARHGDIB on the 1-year death-censored graft failure and adjusted for differences in the following covariates: recipient age (quadratic), donor age (quadratic), donor type (living or deceased, only for the total cohort), cold ischemia time in hours for donation after brain death (DBD) and donation after cardiac death (DCD), time on dialysis in years (quadratic), induction therapy with interleukin- 2 receptor–blocking antibody and the presence of pretransplant donor-specific HLA antibodies against HLA-A/B/DR/DQ. CI, confidence interval; HR, hazard ratio.
